# Supplementary material
Source: HighWire-hosted journal article supplement (https://www.annfammed.org/highwire/filestream/13573/field_highwire_adjunct_files/0/Daoud_Supp_Tables.pdf)
Supplement: Daoud_Supp_Tables.pdf [file Daoud_Supp_Tables.pdf]

**Supplemental material for:**

Daoud A, Hall J, Petrick H, Strong A, Piggott C. The potential for cloth masks to protect health care clinicians from SARS-CoV-2: a rapid review. *Ann Fam Med.* 2021;19(1):55-62.

**Supplemental Appendix****Supplemental Table 1: Search Strategies**

| <b>Database</b>      | <b>Search Term</b>                                                                                                       |
|----------------------|--------------------------------------------------------------------------------------------------------------------------|
| Ovid Medline         | ((homemade or home-made or handmade or hand-made or cloth or fabric) adj3 (mask* or facemask* or PPE)).mp.               |
| The Cochrane Library | (homemade or home-made or handmade or hand-made or cloth or fabric) NEAR/3 (mask* or facemask* or PPE)                   |
| EMBASE               | ((homemade OR 'home made' OR handmade OR 'hand made' OR cloth OR fabric) NEAR/3 (mask* OR facemask* or PPE))             |
| CINAHL EBSCO         | (homemade or home-made or handmade or hand-made or cloth or fabric) N3 (mask* or facemask* or PPE)                       |
| The Web of Science   | ("homemade" or "home-made" or "handmade" or "hand-made" or "cloth" or "fabric") NEAR/3 ("mask*" or "facemask*" or "PPE") |
| CDC.gov              | Journal articles: "cotton face mask"                                                                                     |

**Supplemental Table 2: Excluded Publications, and Reasons for Exclusion**

| <b>Publication</b>                                                  | <b>Reason for Exclusion</b> |
|---------------------------------------------------------------------|-----------------------------|
| Yao, 2019                                                           | Outcome                     |
| Lemmer, 2019                                                        | Outcome                     |
| Chughtai, 2016                                                      | Outcome                     |
| AJN, Editor's Note, 2018                                            | Editor's Note               |
| MacIntyre, 2015                                                     | Review Article              |
| Hildwine, 2006                                                      | Article Style, Outcomes     |
| Chughtai, 2015                                                      | Outcome                     |
| Chughtai, 2013                                                      | Outcome                     |
| Cooper, 1983                                                        | Unable to Obtain Full Text  |
| Halacka, 1962                                                       | Outcome                     |
| Hubble, 1996                                                        | Outcome                     |
| Verbeek, 2019                                                       | Review Article              |
| Chughtai, 2014, International Journal of Infectious Disease pg. 408 | Outcome                     |
| Chughtai, 2014, International Journal of Infectious Disease pg. 417 | Outcome                     |
| MacIntyre, 2012                                                     | Abstract                    |
| Seale, 2012                                                         | Outcome                     |
| Beaumont, 1997                                                      | Commentary                  |
| Belkin, 2000                                                        | Opinion                     |
| Brett, 2012                                                         | Outcome                     |
| Buregyeya, 2012                                                     | Outcome                     |
| Conner, 2001                                                        | Commentary                  |
| Cowperthwaite, 2015                                                 | Commentary                  |
| deKay, 2020                                                         | Commentary                  |
| Schwerin, 2019                                                      | Outcome                     |
| Van Wicklin, 2012                                                   | Commentary                  |
| Morishima, 2019                                                     | Outcome                     |
| Dato, 2006                                                          | Letter to the Editor        |
